# Supplementary material
Source: ML conference proceedings conference paper supplement (https://openreview.net/forum?id=DVl5GAuBXA)
Supplement: supplementary_material [file attachment]

# How Classification Baseline Works for Deep Metric Learning: A Perspective of Metric Space

## 1. Complete proof

**Lemma 1** Set  $d(0, 1) = M$ . If  $d(x, y)$  is a semi-metric on  $R$  that  $L_m(\mathbf{x}, \mathbf{y})$  is also semi-metric on  $R^c$  and by the way:

$$L_m(\mathbf{l}_a, \mathbf{l}_b) = F(2M)$$

**Proof :** By the definition of semi-metric in (1,2):

$$\begin{aligned} L_m(\mathbf{l}_a, \mathbf{l}_b) &= F[d(0, 1) + d(1, 0) + (c - 2)d(0, 0)] \\ &= F[d(0, 1) + d(0, 1) + 0] = F(2M) \end{aligned}$$

**Lemma 2** If  $F$  is a non-convex function, that  $d$  is a weak-metric on  $R$  contains that  $L_m(\mathbf{x}, \mathbf{y})$  is a weak-metric on  $R^c$ ,  $d$  is a metric on  $R$  contains that  $L_m(\mathbf{x}, \mathbf{y})$  is a metric on  $R^c$ .

**Proof :** For any  $\mathbf{x}, \mathbf{y}, \mathbf{z} \in R^c$ , firstly shows that  $d$  is semi-metric contains that  $F$  is semi-metric:

Non-negative:

$$\begin{aligned} L_m(\mathbf{x}, \mathbf{y}) &= F\left(\sum_{i=1}^c d(x_i, y_i)\right) \geq F(0) = 0 \\ L_m(\mathbf{x}, \mathbf{y}) &= F\left(\sum_{i=1}^c d(x_i, y_i)\right) = 0 \\ \Rightarrow \sum_{i=1}^c d(x_i, y_i) &= 0 \Rightarrow d(x_i, y_i) = 0 \quad i = 1, 2, \dots, c \\ \Rightarrow x_i &= y_i \quad i = 1, 2, \dots, c \Rightarrow \mathbf{x} = \mathbf{y} \end{aligned}$$

Symmetry:

$$L_m(\mathbf{x}, \mathbf{y}) = F\left(\sum_{i=1}^c d(x_i, y_i)\right) = F\left(\sum_{i=1}^c d(y_i, x_i)\right) = L_m(\mathbf{y}, \mathbf{x})$$

Then in unit function, non-convex is equivalent to non-negative second derivative, that is for any  $a, b \in [0, +\infty)$ :

$$F''(a) \leq 0$$

By differential median theorem in unit function, set  $\xi_1 \in (0, a), \xi_2 \in (a, a + b)$ :

$$\begin{aligned} F(a) - F(0) &= aF'(\xi_1) \\ F(a + b) - F(b) &= aF'(\xi_2) \\ F(a + b) - F(b) - F(a) + F(0) &= a(F'(\xi_2) - F'(\xi_1)) \leq 0 \\ \Rightarrow F(a + b) &\leq F(a) + F(b) \end{aligned}$$

Thus when  $d$  satisfies triangle inequality:

$$\begin{aligned} L_m(\mathbf{x}, \mathbf{y}) &= \\ F\left(\sum_{i=1}^c d(x_i, y_i)\right) &\leq F\left(\sum_{i=1}^c d(x_i, z_i) + \sum_{i=1}^c d(y_i, z_i)\right) \\ &\leq F\left(\sum_{i=1}^c d(x_i, z_i)\right) + F\left(\sum_{i=1}^c d(y_i, z_i)\right) \\ &\leq L_m(\mathbf{x}, \mathbf{z}) + L_m(\mathbf{y}, \mathbf{z}) \end{aligned}$$

**Lemma 3** If  $L_m(\mathbf{x}, \mathbf{y})$  is a weak-metric with uniform point  $l$  or a metric,  $\mathbf{a}, \mathbf{b} \in R^c$  are two samples with same label  $l \in R^c$ , that:

$$L_m(\mathbf{a}, \mathbf{b}) \leq L_m(\mathbf{a}, \mathbf{l}) + L_m(\mathbf{l}, \mathbf{b}) \leq 2\epsilon$$

**Proof :** By the definition of weak-metric in (1,2):

$$\begin{aligned} L_m(\mathbf{a}, \mathbf{b}) &\leq L_m(\mathbf{a}, \mathbf{l}) + L_m(\mathbf{l}, \mathbf{b}) \\ &\leq 2\sup_{\mathbf{a} \in f(P)} L_m(\mathbf{a}, \mathcal{L}(\mathbf{a})) = 2\epsilon \end{aligned}$$

**Lemma 4** If  $L_m(\mathbf{x}, \mathbf{y})$  is a metric,  $\mathbf{a}, \mathbf{b} \in R^c$  are two samples with different labels  $l_a, l_b \in R^c$  respectively, that:

$$L_m(\mathbf{a}, \mathbf{b}) \geq F(2M) - 2\epsilon$$

**Proof :** By the definition of metric in (3):

$$\begin{aligned} L_m(\mathbf{a}, \mathbf{b}) + L_m(\mathbf{a}, \mathbf{l}_a) &\geq L_m(\mathbf{b}, \mathbf{l}_a) \\ L_m(\mathbf{a}, \mathbf{b}) &\geq L_m(\mathbf{b}, \mathbf{l}_a) + L_m(\mathbf{b}, \mathbf{l}_b) - L_m(\mathbf{a}, \mathbf{l}_a) - L_m(\mathbf{b}, \mathbf{l}_b) \\ &\geq L_m(\mathbf{l}_a, \mathbf{l}_b) - 2\sup_{\mathbf{a} \in f(P)} L_m(\mathbf{a}, \mathcal{L}(\mathbf{a})) \\ &= F(2M) - 2\epsilon. \end{aligned}$$

**Example**  $L_{CE'}^1$  is a weak-metric.  $L_{CE'}^2$  is a metric iff.:

$$2^{p+1} - 2^{2p} \geq \frac{b}{a+1}$$

**Proof :**  $L_{CE'}^1$  is weak-metric with label as its uniform point, that is: for any labels and any  $\mathbf{x}, \mathbf{z} \in [0, 1]^c$ :

$$\begin{aligned} \sum_{i=1}^c \log(1 - |x_i - z_i|) &\geq \sum_{i=1}^c \log(1 - |x_i|) + \sum_{i=1}^c \log(1 - |z_i|) \\ \Leftrightarrow |x_i - z_i| &\leq |x_i| + |z_i| - |x_i z_i| \\ \Leftrightarrow |x_i - z_i| &\leq |x_i| + |z_i| - \min\{|z_i|, |x_i|\} = \max\{|x_i|, |z_i|\} \end{aligned}$$

which is obvious for  $x_i, z_i$  are both positive. And:

$$\begin{aligned}
 & -\sum_{i=1}^c \log(1 - |x_i - z_i|) \leq \\
 & -\sum_{i=1}^c \log(1 - |x_i - 1|) - \sum_{i=1}^c \log(1 - |1 - z_i|) \\
 & \Leftrightarrow |x_i - z_i| \leq |x_i - 1| + |z_i - 1| - |x_i - 1||1 - z_i| \\
 & \Leftrightarrow |1 - x_i - (1 - z_i)| \leq |1 - x_i| + |1 - z_i| - |1 - x_i||1 - z_i|
 \end{aligned}$$

which is similar to above for  $1 - x_i, 1 - z_i$  are both positive. entry in label is only 0 or 1, thus it's down. When  $y$  is arbitrary in  $[0, 1]^c$ ,  $L_{CE'}^1$  is not a metric for when  $x, y, z$  are respectively 0, 1/2, 1 triangle inequality is broken, thus when we need a metric loss,  $L_{CE'}^1$  is need, all we need prove is (set  $a' = \log(1 + a)$ ):

$$\begin{aligned}
 & -\log(1 + a - b|x_i - z_i|^p) + a' \leq \\
 & -\log(1 + a - b|x_i - y_i|^p) - \log(1 + a - b|y_i - z_i|^p) + 2a' \\
 & 1 + a - b|x_i - z_i|^p \geq \frac{(1 + a - b|x_i - y_i|^p)(1 + a - b|y_i - z_i|^p)}{1 + a}
 \end{aligned}$$

set  $k = \frac{b}{a+1}$ , it's:

$$\Leftrightarrow |x_i - z_i|^p \leq |x_i - y_i|^p + |y_i - z_i|^p - k|x_i - y_i|^p|y_i - z_i|^p$$

i. when  $y_i$  is between  $x_i, z_i$  (i.e.  $x_i \leq y_i \leq z_i, z_i \leq y_i \leq x_i$  is similar), set  $u = y_i - x_i, v = z_i - y_i$ , that:

$$|u + v|^p \leq |u|^p + |v|^p - k|u|^p|v|^p \quad s.t. \quad 0 \leq u + v \leq 1$$

It's easy to derive that there's an only extremum for  $u = v = 1/2$ :

$$\begin{aligned}
 & 1 \leq (1/2)^p + (1/2)^p - k(1/2)^p(1/2)^p \\
 & \Rightarrow 2^{p+1} - 2^{2p} \geq k
 \end{aligned}$$

ii. when  $y$  is out of range between  $x$  and  $z$  (i.e.,  $x \leq z \leq y$ , or similarly  $y \leq x \leq z$ ), set  $u = z - x, v = y - z$ , that:

$$\begin{aligned}
 & |u|^p \leq |u + v|^p + |v|^p - k|u + v|^p|v|^p \quad s.t. \quad 0 \leq u + v \leq 1 \\
 & \leq |u + v|^p + |v|^p - |v|
 \end{aligned}$$

for both  $k$  and  $|u + v|$  is less than 1.
